# Supplementary material for: Null alleles are ubiquitous at microsatellite loci in the Wedge Clam ( Donax trunculus )
Source: PeerJ journal article supplement (doi:10.7717/peerj.3188), 2017-04-18

**Without the locus D.tru2**

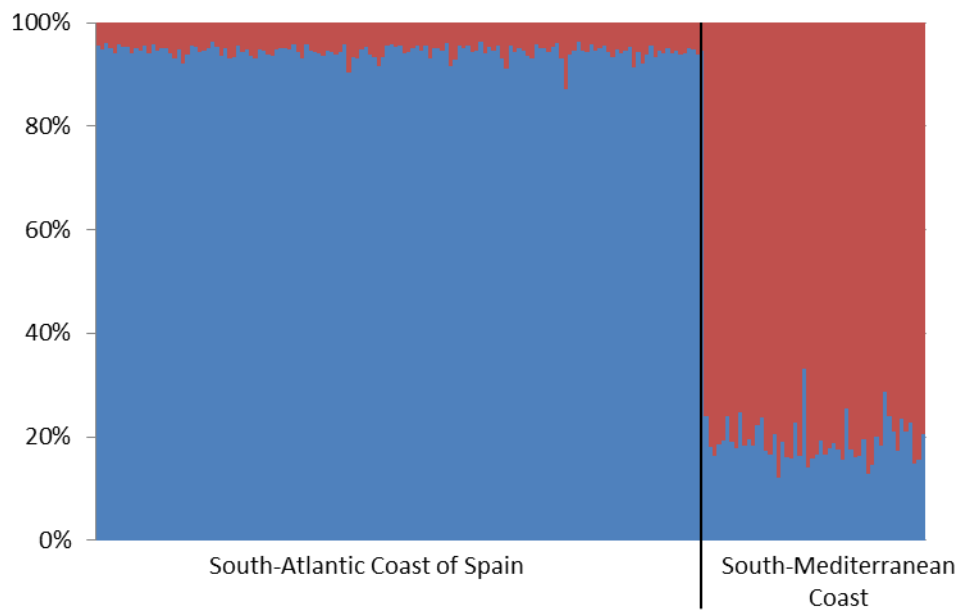

**Without the locus D.tru4**

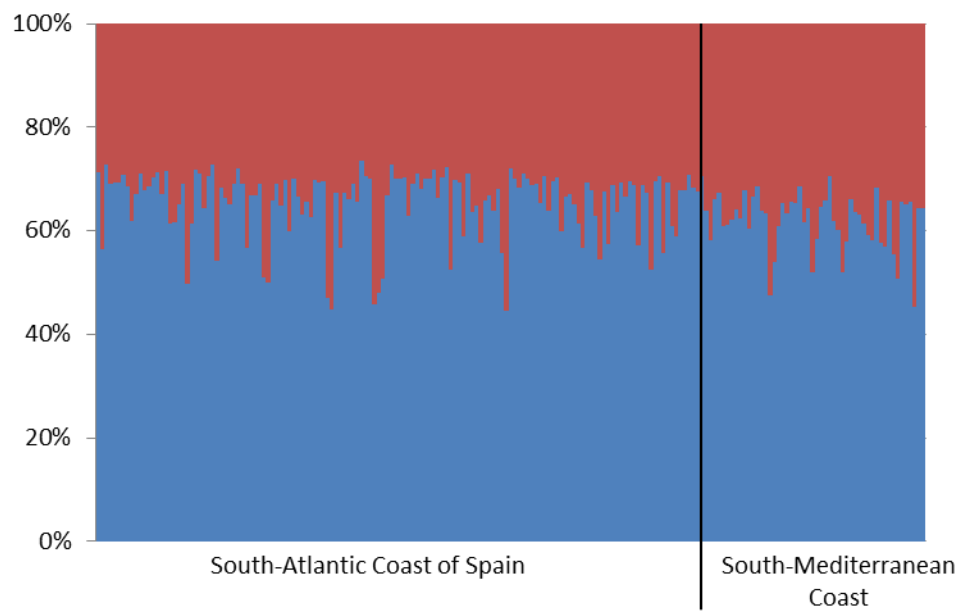

**Without the locus D.tru6**

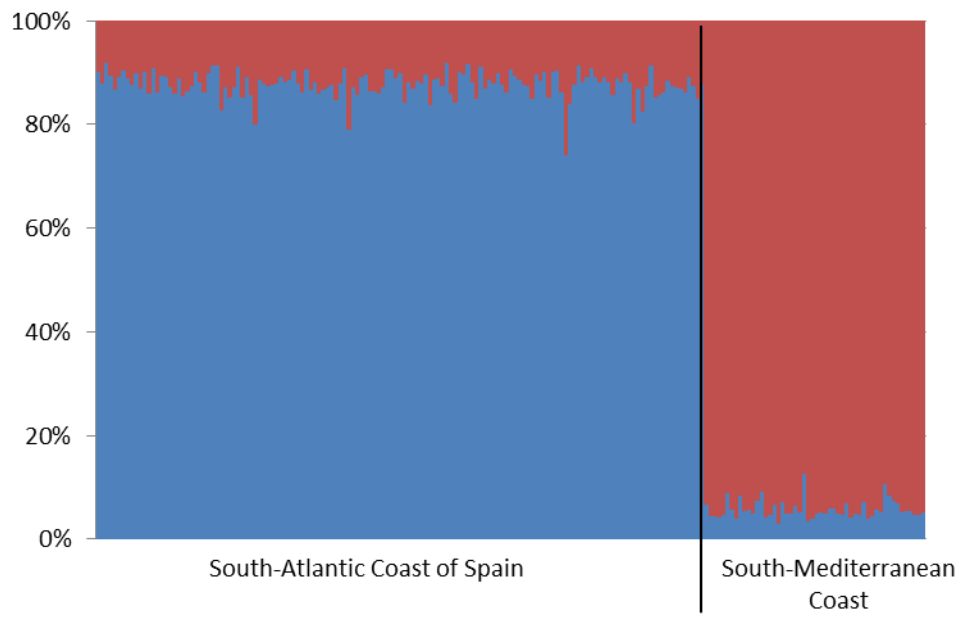

**Without the locus D.tru8**

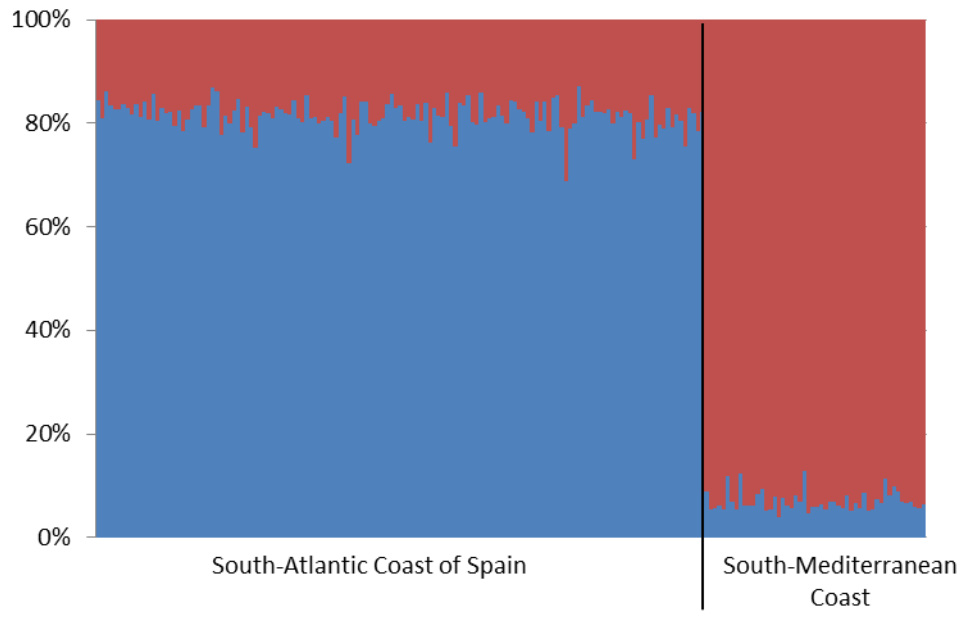

**Without the locus D.tru11**

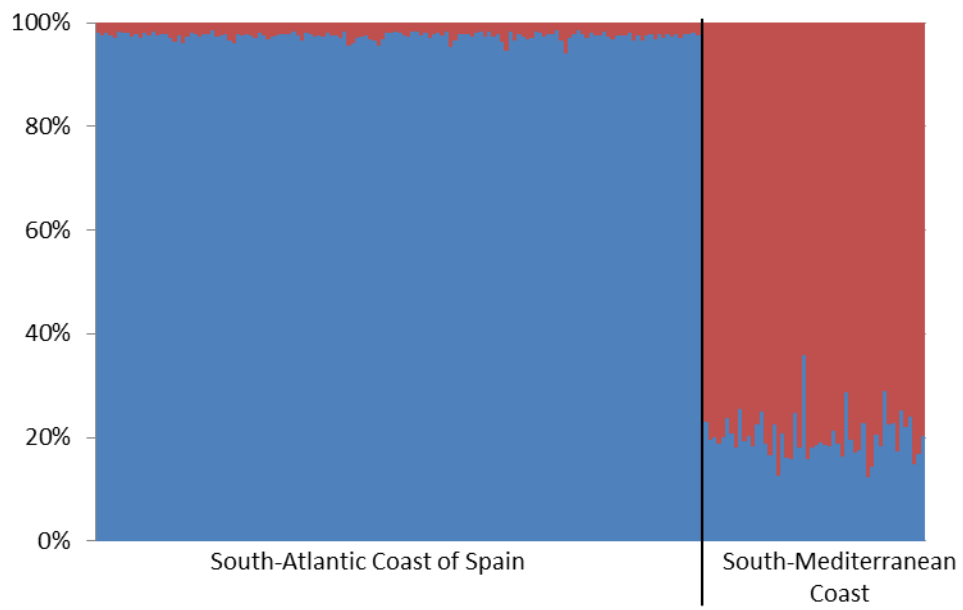

**Without the locus D.tru14**

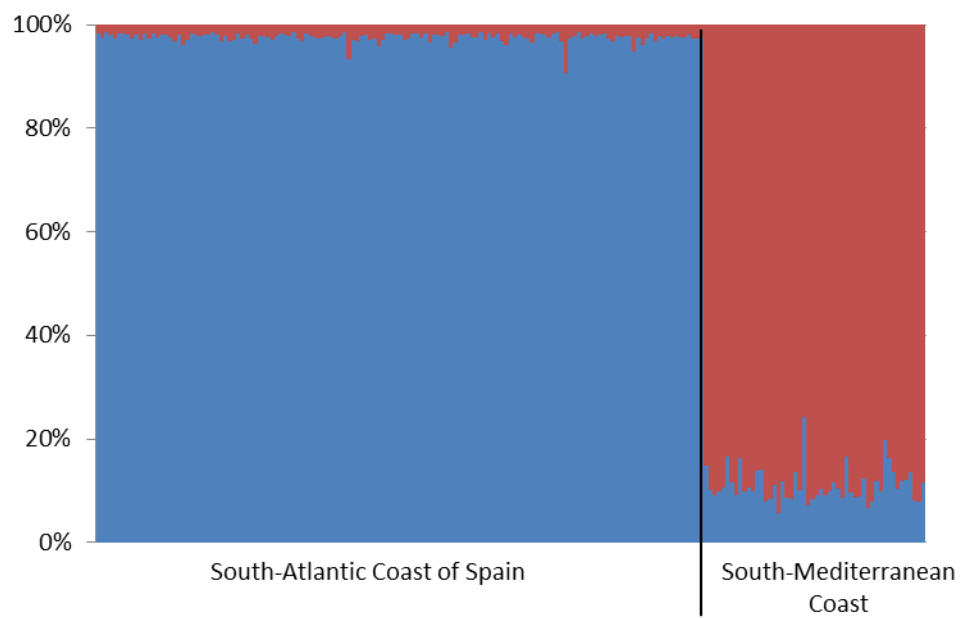

**Without the locus D.tru15**

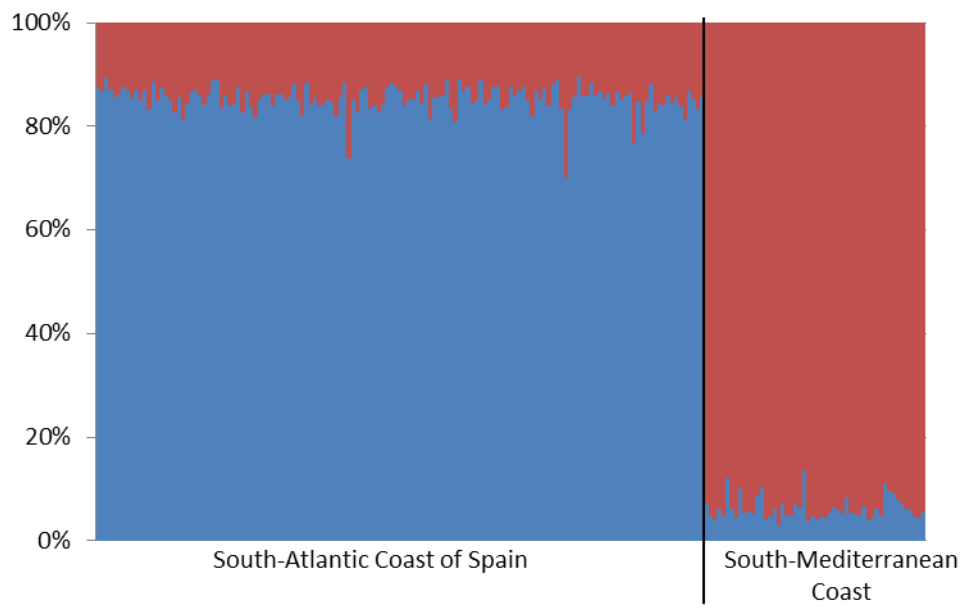

**Without the locus D.tru16**

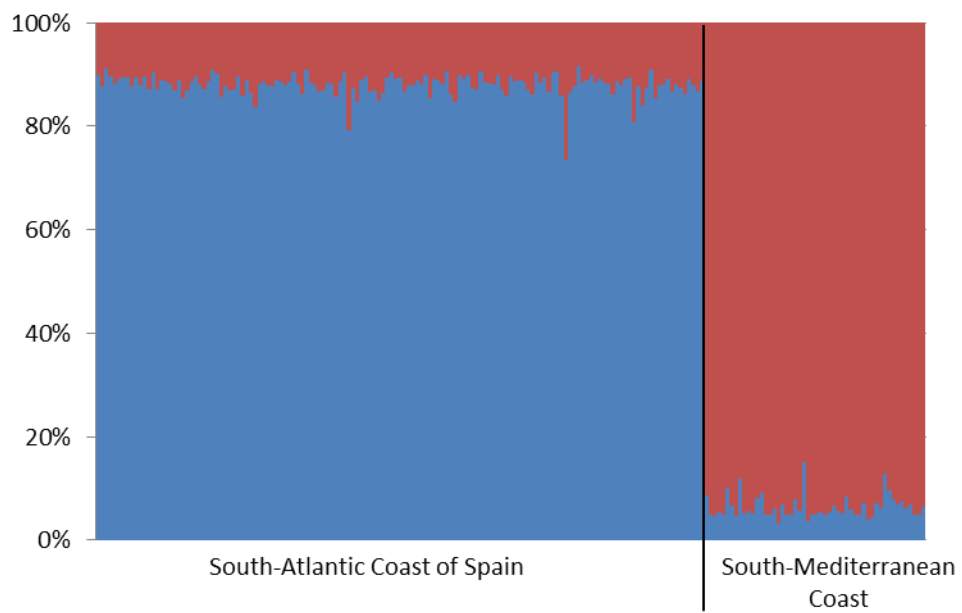

**Without the locus D.tru19**

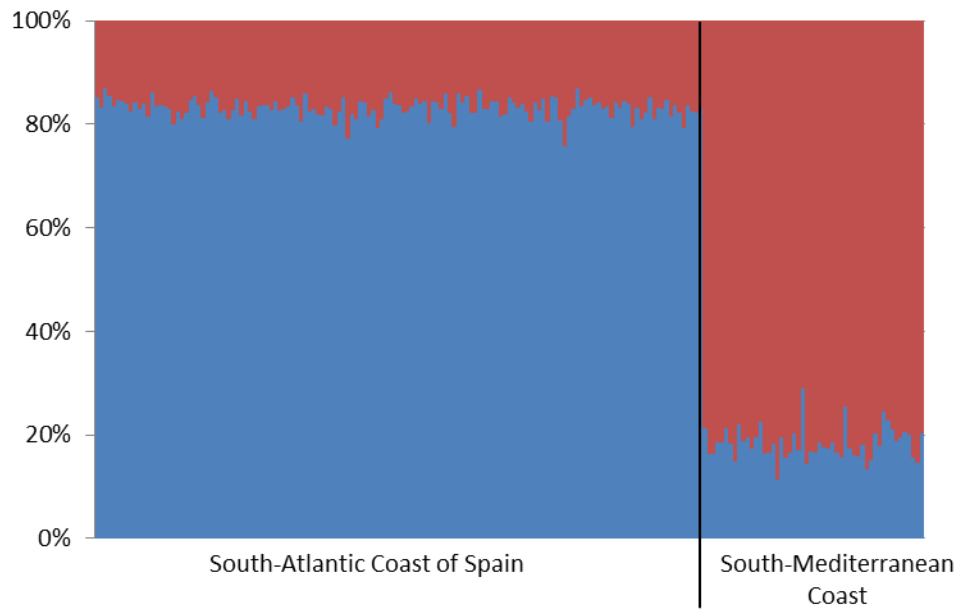

**Without the locus D.tru22**

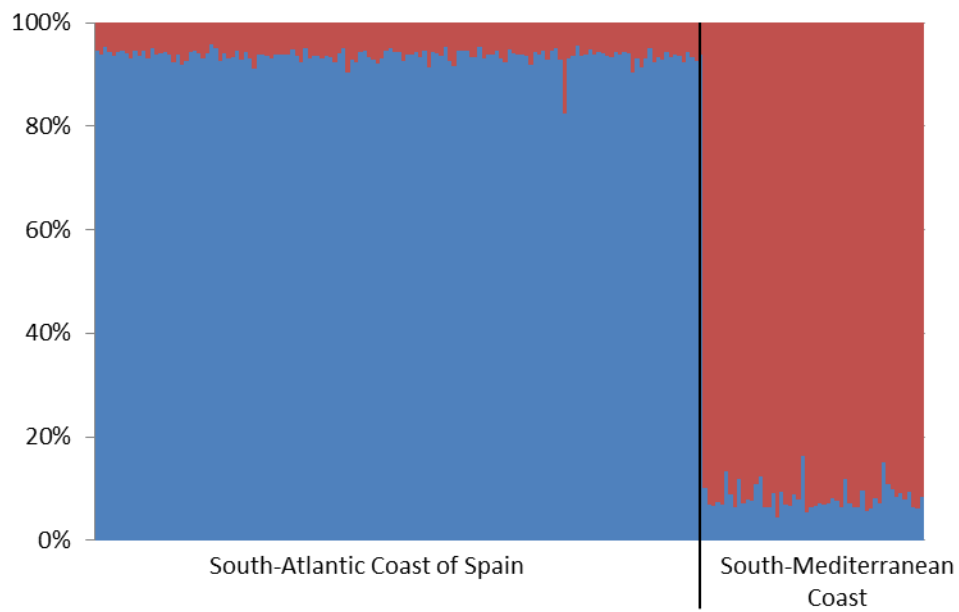

**Without the locus D.tru23**

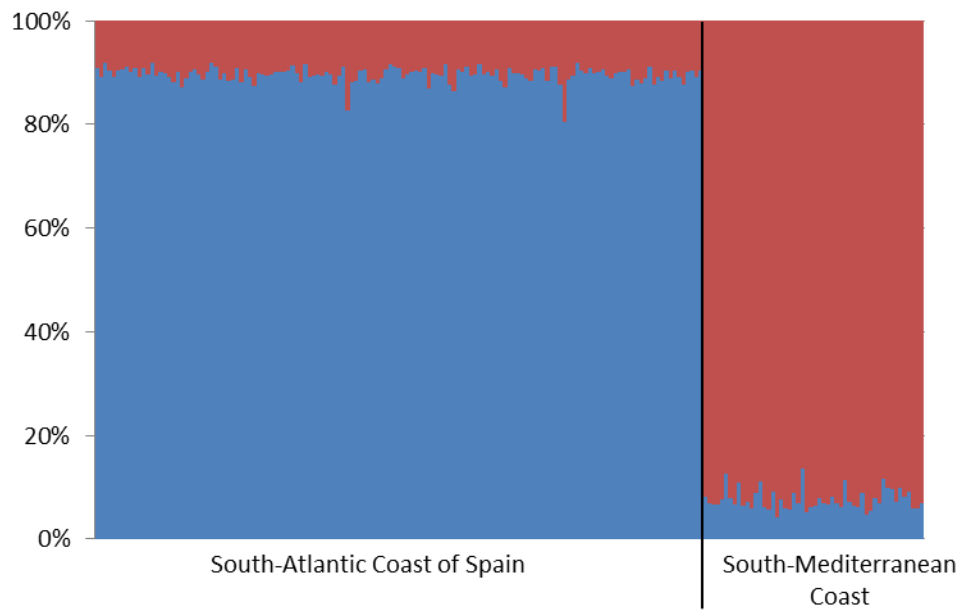

**Without the locus D.tru26**

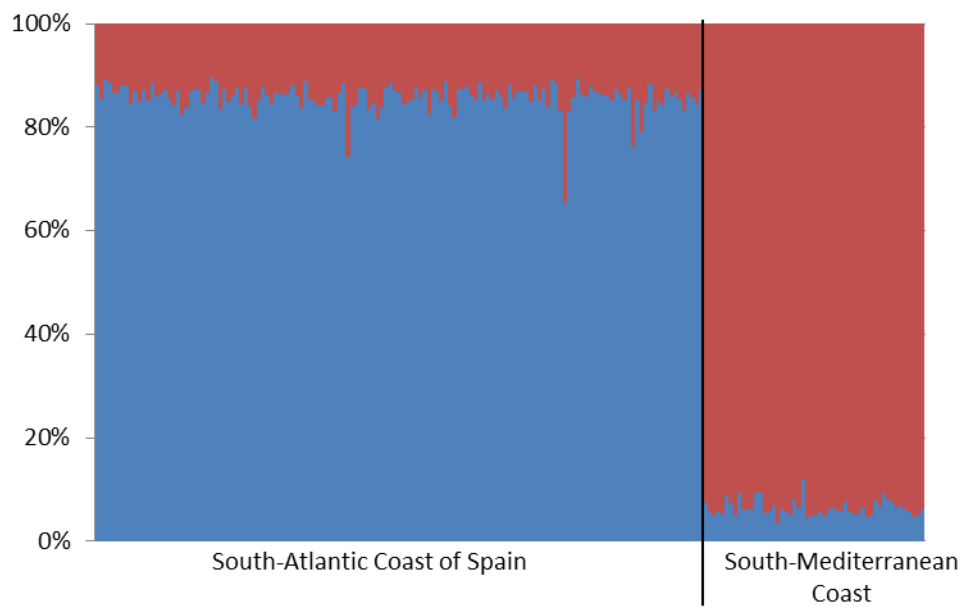

**Without the locus D.tru29**

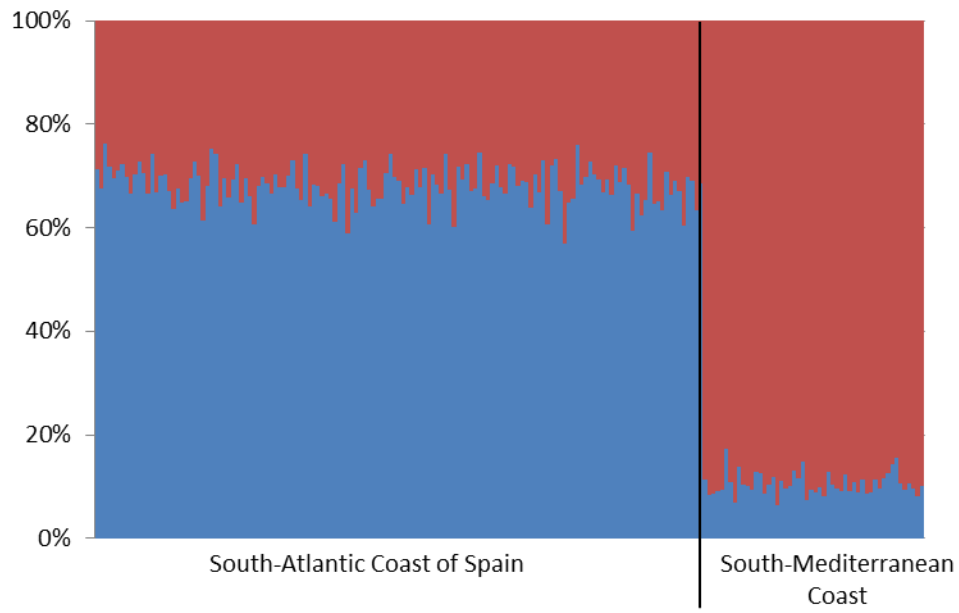

**Without the locus D.tru32**

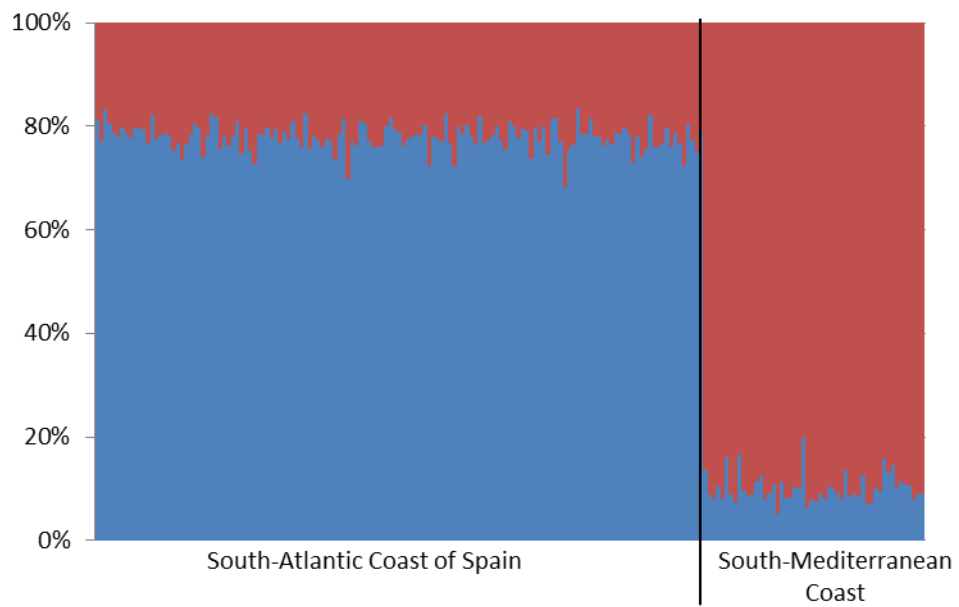

**Without the locus D.tru40**

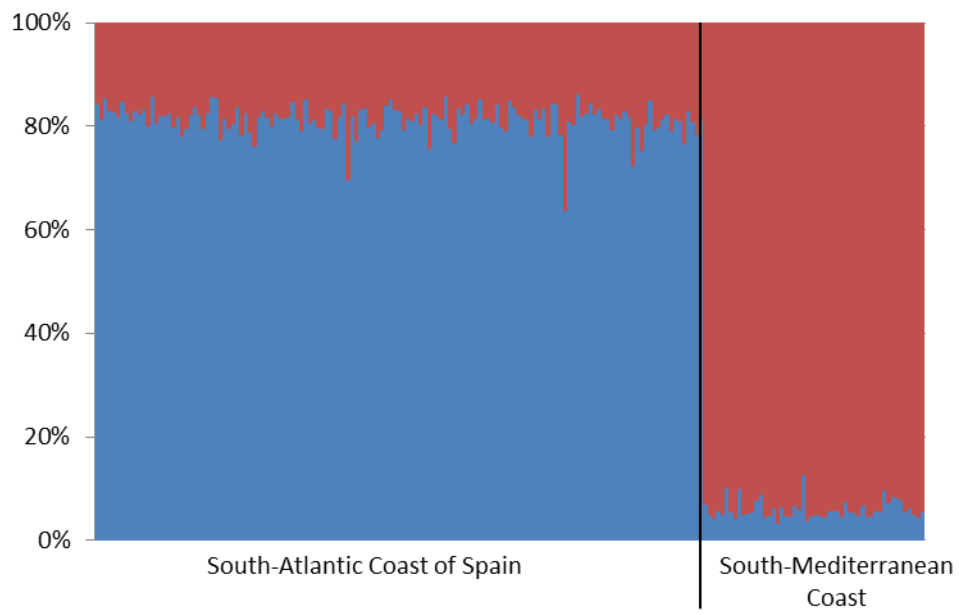

**Without the locus D.tru49**

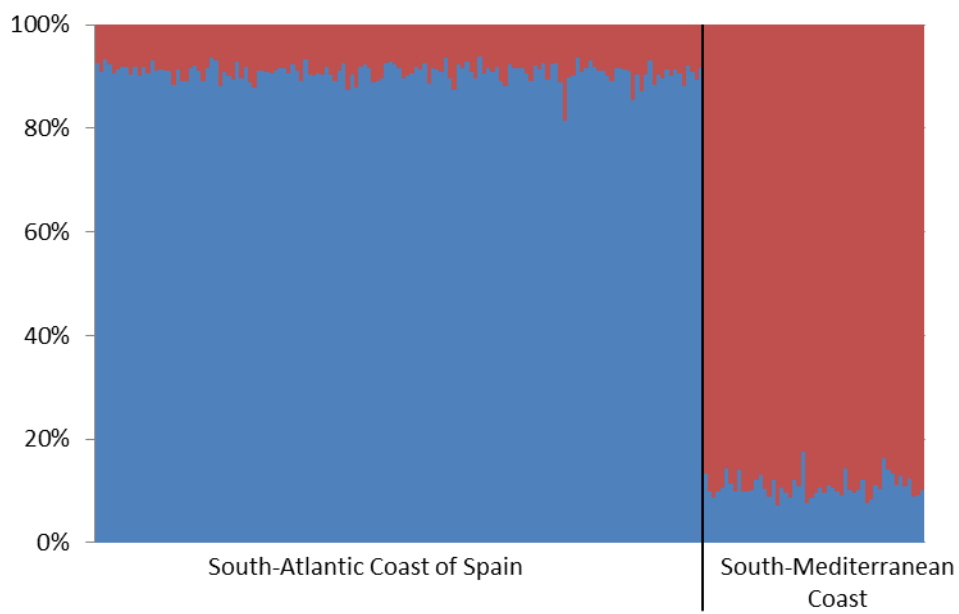

Supplement: Supplemental_Figure_1.pdf [file Supplemental_Figure_1.pdf]
