# Supplementary material for: Null alleles are ubiquitous at microsatellite loci in the Wedge Clam (Donax trunculus)
Source: PeerJ. 2017 Apr 18;5:e3188. doi: 10.7717/peerj.3188 (PMC5398275; doi:10.7717/peerj.3188)
Supplement: Table S2 — The results issued from the software Structure present the average of the level of individuals’ assignment (percentage ±SD) using the 16 loci and when removing a different locus for each run. [file peerj-05-3188-s003.xlsx]

## Sheet: AverageLevelIndAssignment
		South Atlantic Coast of Spain		South Mediterranean Coast of Spain
	Locus	Average	SD	Average	SD
	D.tru2	0.944	0.012	0.808	0.04
	D.tru4	0.655	0.065	0.382	0.054
	D.tru6	0.877	0.026	0.943	0.018
	D.tru8	0.815	0.028	0.93	0.02
	D.tru11	0.96	0.058	0.894	0.07
	D.tru14	0.976	0.009	0.889	0.034
	D.tru15	0.853	0.027	0.938	0.022
	D.tru16	0.88	0.022	0.936	0.023
	D.tru19	0.831	0.018	0.816	0.031
	D.tru22	0.936	0.014	0.918	0.024
	D.tru23	0.896	0.015	0.924	0.02
	D.tru29	0.857	0.028	0.937	0.016
	D.tru32	0.682	0.037	0.895	0.022
	D.tru40	0.779	0.026	0.899	0.028
	D.tru49	0.812	0.03	0.941	0.018
