# Supplementary material for: Null alleles are ubiquitous at microsatellite loci in the Wedge Clam (Donax trunculus)
Source: PeerJ. 2017 Apr 18;5:e3188. doi: 10.7717/peerj.3188 (PMC5398275; doi:10.7717/peerj.3188)
Supplement: Table S3 — We provide three databases: the database we used for the analyses (16 loci), the database with the original annealing temperature (10 loci), and the database with the new annealing temperature (10 loci). [file peerj-05-3188-s004.xlsx]

## Sheet: 16 loci
Population genetics in Donax trunculus
Dtru2
Dtru4
Dtru6
Dtru8
Dtru11
Dtru14
Dtru15
Dtru16
Dtru19
Dtru22
Dtru23
Dtru26
Dtru29
Dtru32
Dtru40
Dtru49
Pop
IC03 ,	103148	155159	115117	133145	111111	96096	253253	88102	142146	227227	107107	87087	271310	248248	141141	166166
IC04 ,	106124	159161	119119	136145	111113	93093	229235	90098	156156	230230	107109	81085	286286	236236	129145	156156
IC05 ,	100100	159159	111115	136136	111111	96096	0	84092	142142	227227	107123	91091	289289	239239	135135	160160
IC07 ,	100100	159159	111111	136145	111139	102102	243255	94096	144144	227227	107133	69089	289289	239272	135135	156156
IC08 ,	97148	157159	111117	139148	111111	96096	233241	92096	134152	233233	107109	87093	289289	239239	119129	158158
IC09 ,	100124	159165	119119	151151	111111	0	251251	84106	166166	227230	107107	75077	262298	214214	129129	158160
IC10 ,	97100	159165	103117	145145	111111	96096	235243	92100	150150	227227	107117	87095	289289	242242	137151	158160
IC11 ,	103109	155159	111111	145145	135135	96096	239239	92092	146148	227227	125129	67085	277310	214242	139139	164164
IC12 ,	103109	159167	119119	139145	129129	96096	237243	98110	136154	227227	121125	89089	301301	239239	139147	164164
IC15 ,	100109	159165	119119	136142	111111	93093	271271	84096	146150	230230	107151	85089	307307	239239	137137	164164
IC16 ,	109115	159177	109117	136136	111111	96096	235253	94096	150156	230230	107107	89089	268292	239254	131139	160160
IC17 ,	109109	155159	113125	148151	111137	96096	233237	92092	148148	230230	107131	85089	277310	239239	137139	160160
IC18 ,	100112	155167	113117	139145	117121	102102	219255	98110	142150	227227	113117	83087	289289	239239	137139	156156
IC19 ,	97100	155159	113117	145145	111129	96096	233233	98100	136154	227227	107125	77089	283283	239242	131133	164164
IC20 ,	106109	153155	109117	145145	111123	96096	233241	98098	134142	218227	107119	83087	283283	239239	137137	156172
IC21 ,	100109	155157	119119	136142	139139	96096	247271	94100	136156	227233	117133	81089	283304	242242	135135	160164
IC22 ,	109148	157169	109125	136136	111111	96096	255255	88096	138152	230233	107107	83085	304310	239239	133135	160160
IC23 ,	103106	157167	109117	154154	111113	96096	219237	82098	144150	230230	107109	89097	301301	239239	121131	156156
IC24 ,	103148	157167	119119	142145	123123	96096	237245	86090	138152	227227	119119	83101	271271	239239	131137	160160
IC27 ,	100109	159167	119119	139145	127133	96096	233233	90090	154156	227227	123127	95097	292301	236236	137137	166166
IC28 ,	100100	157159	123123	136142	111121	96096	243255	86088	134134	224227	107117	75083	292292	236236	137143	156166
IC29 ,	142142	153155	119119	142142	113129	96096	225255	92092	144148	227227	109125	75087	286286	239239	133137	160164
IC30 ,	124148	155159	111117	136142	113145	96096	241241	88096	164164	230230	109139	79081	286292	211211	133135	164164
IC31 ,	109109	155159	111129	136136	111111	96096	237237	86098	152166	230230	107107	89099	292292	239239	139147	158158
IC32 ,	106148	157159	111111	0	111111	96096	271271	98100	144150	230230	107107	67087	289289	239254	121139	164164
IC33 ,	97097	159165	109123	142142	133139	105105	267271	82090	144156	230230	127133	85101	301301	211239	131139	160160
IC34 ,	103106	155159	115115	0	111127	96096	233235	84098	134142	221221	107123	85097	301301	236239	141141	164164
IC35 ,	109109	155167	117117	127136	111111	96096	245245	98098	138154	230245	107107	81087	301307	242242	129139	158158
IC36 ,	109148	155159	119119	142145	111113	96096	235243	98098	150154	230230	107109	75093	286286	236236	121137	156156
IC39 ,	109109	157159	111117	145145	109131	96096	235249	94100	146160	230230	105127	87087	283283	239239	133133	160160
IC40 ,	112130	155159	113117	136148	123123	96096	231241	98098	150150	230230	119119	73079	286319	214239	137139	164164
IC41 ,	100100	157167	117117	136139	123123	96102	231241	90092	136152	230230	119119	79081	292310	239239	133137	156156
IC42 ,	100109	155157	109119	139142	111111	96096	235235	100100	142142	230230	107107	85119	289289	239239	135137	160160
IC43 ,	100103	159167	115131	145148	111111	96096	219241	88098	136154	227227	107107	87091	307307	239239	129129	156156
IC45 ,	109121	159159	117129	133145	111143	96096	241251	88096	138162	227230	107137	83095	289304	239239	129137	156156
IC46 ,	109109	155165	117123	136148	113125	96096	233233	98102	138146	230230	109121	83083	286286	211211	133133	156160
IC47 ,	118118	159159	113113	136142	111129	90090	235241	90098	144160	230230	125125	75097	298322	239239	137139	160160
IC48 ,	115115	157165	111117	136145	129145	96096	237259	88096	126134	227227	125139	83085	271286	239239	139143	156158
IC51 ,	109109	157159	71115	145145	111131	96096	251255	96102	144148	221221	107127	75089	292295	248248	133147	164164
IC52 ,	112112	159167	111119	145145	111113	96096	231271	90092	132148	233233	107109	107107	289289	242242	131137	164164
IC53 ,	100100	157157	111119	145145	111113	96096	231237	96098	144148	233233	109109	81081	286286	239245	129137	164164
IC54 ,	142142	157159	119119	136148	123135	96096	245245	100112	142146	221221	119129	91091	301301	239239	129129	156158
IC56 ,	109148	159167	113117	0	111111	102102	243243	78092	154162	227227	107137	85085	289292	239239	137139	160160
IC57 ,	142142	157165	119123	142142	139145	96096	219241	92100	152156	227227	133139	89097	277310	236236	135135	156156
IC59 ,	109139	157159	109109	136142	123123	96096	245245	98102	154154	227227	119123	75075	283283	245245	137139	162164
IC6 ,	148148	155159	119119	145145	125133	96096	237237	88094	136158	227227	121127	87097	310316	242242	121121	160160
IC60 ,	97148	159165	113117	136136	111111	99099	237251	90106	156158	227227	107117	75097	292292	239239	129155	160160
IC63 ,	106115	159165	109109	136145	111125	0	235245	86098	134160	227227	107121	85087	298298	239239	133145	156156
IC64 ,	109148	157157	113121	139151	113123	93093	245251	94098	154154	227227	109119	85085	289289	239239	121139	160166
IC65 ,	100109	157159	111117	136136	113123	96096	245245	102106	148158	227227	109119	87091	271310	214239	137139	156156
IC66 ,	103103	159165	71113	139142	113143	96096	253253	96108	138162	227227	109137	81081	295295	272272	121143	164164
IC67 ,	115115	155165	113115	133133	123123	96096	243243	96096	132158	227230	119119	75087	292292	254254	121129	160160
IC68 ,	112112	151167	109117	136136	117137	96096	235245	98100	154158	230230	113131	85089	292292	239239	135139	156156
IC69 ,	112118	159167	71071	139148	111117	99099	243243	90098	132154	221221	107113	75089	292292	239239	145145	162162
IC70 ,	142142	159167	109117	145145	113125	96096	231245	78090	140152	227227	109121	79089	283283	236239	131153	162166
IC71 ,	142142	159167	109115	145145	113125	93096	231245	78090	140152	227227	109121	79079	283283	236239	131153	160164
IC72 ,	109112	0	119119	145148	111119	99099	267267	90092	150150	227230	107115	75093	301307	239239	121137	148158
IC75 ,	142142	157165	111119	136148	111113	96096	0	90094	150150	230230	107109	79079	271298	239239	121133	166166
IC76 ,	142142	159167	75119	136148	111111	75102	235271	94100	138150	233233	107107	75097	301301	239239	139139	160160
IC77 ,	142142	159167	117127	130130	121123	96096	235241	96096	142142	230236	117119	79099	292292	239239	133143	156168
IC78 ,	109109	157165	109119	136148	111111	99099	233239	86098	146154	227227	107133	75075	289289	214239	131141	156156
IC80 ,	100106	159165	85119	136139	123123	96096	263263	88098	136136	230230	119121	73077	286286	248251	135137	160160
IC81 ,	100109	157157	113117	136139	111111	96096	0	98100	154158	227233	107107	77085	301301	239239	139139	164164
IC82 ,	115115	155159	117119	136139	111111	93096	237241	86098	152156	227230	107107	77089	277292	239239	137137	156156
IC83 ,	100109	157159	75119	136148	111111	96096	235235	92096	136154	0	107107	67089	286304	226254	121139	156168
IC84 ,	142148	165173	119119	136139	113113	96096	231235	92096	132144	227227	109151	85085	286286	239239	131137	160160
Pop
DO02 ,	100109	157165	119119	142148	113125	102102	233237	98098	148148	230230	109121	75075	292301	239239	139139	156166
DO03 ,	109109	157165	119119	142148	125139	102102	233237	98098	148148	230230	109121	75099	295298	239239	139139	156160
DO04 ,	100109	159165	83113	145145	111111	93093	233253	96098	136142	221227	107109	79081	283283	236254	121137	156156
DO05 ,	100109	157159	109117	136148	111145	96096	235245	92098	142142	221221	107139	75087	310310	242242	137137	158160
DO06 ,	109109	155165	111113	136136	123135	96096	251259	84098	152152	227227	119129	85089	301301	211211	143143	156156
DO07 ,	100103	159165	113115	142142	111111	0	233243	102102	142152	227230	107143	75085	295307	211239	135155	158158
DO08 ,	100103	157165	111117	142148	111129	96096	257257	96096	138160	227227	107125	89103	301301	239239	129147	164164
DO09 ,	109112	0	119119	136148	111111	87087	237237	90100	136152	230230	107129	89091	289289	211239	131135	160160
DO10 ,	106109	159167	109117	133136	119119	75129	241241	98106	134158	230230	115129	75075	283283	245245	129137	160160
DO11 ,	109112	155155	111117	139148	111111	99105	233241	92098	130156	233233	107107	57091	292292	236242	139139	164164
DO12 ,	100109	155159	119119	136136	111111	96099	245245	84094	134140	227227	125129	91093	289289	236278	129129	156172
DO13 ,	100148	157159	109117	136145	137137	96096	239239	86100	152156	227233	131131	75091	289301	211211	133139	156156
DO14 ,	100109	0	109115	136148	111143	96099	237243	86112	130130	227227	107137	95095	271295	239242	139139	162164
DO15 ,	100109	155155	71117	136142	111111	99099	255255	86092	130158	230230	107107	85093	292292	242242	135147	166166
DO16 ,	97109	159173	113115	136136	111113	99099	219219	88110	138162	221230	107109	95095	271271	242242	139147	164164
DO18 ,	100109	157159	71075	136139	111111	93093	243257	88112	134134	227227	107107	75081	289289	211239	137145	166166
DO19 ,	100106	155165	113113	145145	111111	99099	0	98098	152152	227230	107107	89089	283283	242272	143143	156156
DO20 ,	106106	157157	109119	136145	113113	0	237253	96100	132146	227230	109109	87087	292292	239239	137139	156156
DO21 ,	103109	157165	77115	136151	111111	96099	241261	90090	142142	224227	107107	83083	292301	239239	145153	164164
DO22 ,	109109	159165	117121	136145	111111	96096	239279	92094	136144	227227	107107	85091	286295	236236	139139	164164
DO24 ,	100106	159165	119123	142142	111113	96096	235243	92106	140154	0	107109	85085	295295	211214	129129	164164
DO25 ,	100100	155159	115123	142142	111127	96096	233245	98098	136136	227227	107123	87089	295295	242242	147147	156156
DO26 ,	100109	157159	123123	136145	113113	87096	235245	98102	146152	227227	109115	67095	292292	239257	135137	156156
DO27 ,	100109	159167	111117	136148	113143	96096	219225	90098	154156	224224	137143	87087	265265	239239	131153	160160
DO28 ,	115115	159159	111119	136148	113113	96096	219251	88100	146156	230230	109109	81089	283283	236236	139139	158176
DO29 ,	100109	155159	107113	133133	111123	0	219233	96108	144144	227227	121121	81097	271271	239239	119139	156156
DO30 ,	142142	159159	75115	145145	111141	84087	219219	92102	140152	221221	107135	67085	283301	239239	139143	156156
DO31 ,	142142	159165	109119	145145	111111	96096	265279	94096	132140	230230	107107	75075	298298	239239	135135	164164
DO32 ,	112148	155165	115117	136136	111139	96096	231235	96114	142152	230230	107133	89089	292298	242254	131131	160160
DO33 ,	112112	155165	115115	142142	113121	96096	245245	90096	152158	230230	109117	73085	289289	239239	139139	160160
DO34 ,	142148	157167	119119	136142	111113	96096	237243	90100	140146	230230	107109	79079	289289	236239	137139	160164
DO35 ,	100106	159159	107109	136139	111111	96096	243255	98102	136154	221224	107107	75093	271271	239239	127139	160160
DO36 ,	115115	159159	113113	142148	111111	96096	255255	92098	146146	221230	107107	75091	292292	239239	121131	166166
DO37 ,	100100	159169	119119	133139	111111	96099	249249	90094	150158	227227	107107	81095	286286	211242	139143	156156
DO38 ,	109109	159167	109117	136148	111111	96096	229243	90096	146146	221221	107107	95095	271310	257257	135135	156156
DO39 ,	97097	159165	111115	145145	111111	96096	241241	98098	132150	230230	107107	73079	292292	226251	141141	166166
DO40 ,	100109	159165	99111	148148	117117	96096	237237	86112	142154	227227	113139	73083	271271	236236	141141	156156
DO41 ,	142142	155159	111115	127127	111137	99099	245245	82082	138150	227227	107133	95095	271271	239239	137137	158158
DO44 ,	109112	159165	119119	136136	139141	102102	233245	92106	142142	233233	135159	89091	271289	239239	139145	156156
DO47 ,	109109	157159	115117	145145	111111	96096	219231	98106	142142	230230	107127	75087	289289	214236	135135	156156
DO48 ,	112142	159159	113119	139148	0	96096	233247	82094	132152	230230	133159	79101	286301	239245	121121	156156
DO49 ,	100100	159165	111111	136148	111133	96096	219237	90092	146152	227227	107127	83087	301301	239239	129137	160160
DO50 ,	106109	159165	111111	145154	111111	96096	255273	82096	148152	221221	107133	75075	271292	239272	139139	160160
DO51 ,	100100	157165	131131	136139	111113	99099	233243	90100	154158	230230	109109	85089	280280	229239	133139	158164
DO52 ,	100109	151157	119119	145157	129143	96096	233243	98106	134146	245245	125137	75099	280280	251251	139139	156156
DO53 ,	109109	157167	111117	133133	121145	96096	235235	92096	134148	221230	117139	81089	289289	239239	131151	156158
DO54 ,	103106	159159	119119	136145	131139	99099	235261	92100	144144	230230	127133	77085	271298	239272	137137	158158
DO55 ,	97109	159159	111117	136142	111113	102102	237237	100104	138138	227227	109109	75075	307307	226242	129139	160160
DO56 ,	109109	155159	109119	136136	119125	0	235243	88092	140154	227227	115121	97097	286289	239239	121129	158158
DO60 ,	118148	157159	113113	142145	111111	99102	245253	94100	132144	227227	107107	75089	289301	242242	137139	156156
DO61 ,	115115	159159	119119	145145	111111	96096	239245	84098	154154	230233	107107	75075	283283	239239	145145	0
DO62 ,	100112	159159	119119	136145	111135	102102	219235	90098	140154	221221	107131	83085	292292	236236	143143	156156
DO63 ,	115115	159167	117117	145145	113113	96096	237277	90090	144158	230230	109127	91091	289289	211236	139151	158158
DO64 ,	97115	159167	119121	142145	141141	87093	255255	94098	156156	227230	135153	75083	307307	236236	121121	160160
DO65 ,	106109	157159	119119	142154	111113	0	235247	92096	146158	233233	109109	71075	292292	242242	137137	160160
DO66 ,	106148	157157	111119	136154	111111	87093	233241	88100	154154	245245	107129	93093	289289	239239	137137	160160
DO67 ,	109148	159159	77111	136136	111113	96096	233243	92096	150160	224224	107109	83083	280280	214214	137137	156158
DO68 ,	142142	155159	113113	136136	111117	99099	235235	96098	158158	224227	107113	85085	298298	239239	121121	156172
DO69 ,	100109	155159	115115	136136	113119	96096	255255	94096	136142	230230	109115	75091	292292	239239	141141	158158
DO70 ,	100109	155165	111119	136145	111111	0	243243	104110	142156	221221	137143	77103	286286	239239	139139	158158
DO71 ,	100109	157159	97111	136151	111117	96096	257257	84098	144144	224230	113157	71075	283289	248251	137139	164164
DO72 ,	103142	155159	113119	136148	113113	96099	219239	90094	134136	221227	109109	99099	289289	263263	129129	0
DO73 ,	100100	159171	115117	142151	133133	93099	245245	98104	134144	227230	129167	75075	292292	251251	137137	156160
DO74 ,	100106	155165	115119	142142	111131	0	243277	98104	138160	227227	107127	81081	298298	236239	129141	156156
DO75 ,	100109	159167	119119	145145	113113	96096	255255	88114	150154	227227	109109	91091	289289	239239	137137	156156
DO76 ,	109148	157165	109125	136136	111133	96096	243243	92100	158158	227230	107127	79087	289289	229239	119139	158158
DO77 ,	100109	155159	117117	136142	111111	90129	257257	80094	132162	224227	107137	75087	307307	239239	141141	156156
DO78 ,	103109	159165	119119	136148	113139	78096	219239	110110	144146	227230	109133	85085	283283	239239	131145	160160
DO79 ,	100100	159159	113117	136139	111123	0	245245	94102	132134	224230	119119	97097	271304	236251	139139	158158
DO80 ,	100109	159159	107121	136145	113113	99099	243277	84098	136154	230230	109153	73073	271304	239239	139139	156156
DO81 ,	142142	159159	109111	145145	113117	99129	231231	88100	134148	227227	109113	85087	289289	239239	135139	172172
DO83 ,	118148	157159	111121	133145	111111	96096	245245	88092	148146	230230	107117	99099	292292	239239	121143	156156
DO84 ,	106109	157159	69097	136136	123127	96099	0	70094	152156	230233	119123	93101	292298	239239	137155	164164
DO85 ,	100109	157159	75109	136148	111111	96096	231235	92096	136154	224227	107107	67089	283283	226254	121139	156156
DO87 ,	115115	159159	83117	139139	111115	99099	231235	96112	150152	233233	107111	75095	289310	236236	129129	164164
DO88 ,	103148	155157	111111	145145	117143	99099	237253	96096	132144	227227	113137	75077	271271	211239	155155	164164
Do89 ,	100109	157159	117117	145145	123135	96096	251251	98112	154156	221227	119129	87087	301301	239239	133133	156164
Pop
MA01 ,	109124	157157	117119	142142	131139	96096	237271	84090	134142	221221	127133	67093	292292	260260	133139	156156
MA02 ,	100109	157157	129129	136136	113135	96096	225231	92106	130144	221221	109113	73095	292298	239260	131131	156166
MA03 ,	109127	157157	115123	142142	117135	96096	255279	96104	146156	224230	113129	87087	292292	239251	139139	160160
MA04 ,	109124	157157	111121	136148	111111	96096	229247	94098	134146	224230	107141	87087	301301	239260	121131	164164
MA05 ,	112142	157157	121121	145145	115137	96096	235235	98098	136146	227236	111143	79083	280289	263263	131137	156166
MA06 ,	106148	157157	111115	142145	145145	102102	235243	98110	138154	227230	107121	79089	280289	239239	129143	156160
MA07 ,	142142	157157	109119	142151	123129	96096	245279	90096	142142	230230	107119	73085	292292	242242	129145	156156
MA08 ,	109115	157157	113113	139142	111119	96096	237243	86096	166176	230230	143147	93093	286310	239239	121151	156168
MA09 ,	100100	157157	115117	139142	111113	96096	233249	88108	138156	227227	107109	81087	286286	251251	121139	164164
MA10 ,	100148	157157	115115	145145	131133	108108	241241	98098	134134	227227	127127	0	292292	239239	139139	156160
MA12 ,	115142	157157	115115	136148	113123	120120	239239	88092	134140	227230	109119	69073	292292	211254	139139	158158
MA13 ,	109148	157157	109109	139145	103111	99099	235241	102102	132142	230230	107123	85095	292292	239239	121131	156166
MA14 ,	109109	157157	109115	136148	111111	96096	235243	94112	152152	230230	107157	73087	271304	211211	137139	156160
MA15 ,	109148	151157	113115	136145	111119	93093	243243	100100	142146	230230	107121	97097	301301	236239	137139	164164
MA16 ,	100112	157157	113123	136139	111131	75093	231245	90094	160160	227230	107149	0	289289	239239	131131	156168
MA17 ,	109124	157177	119119	136145	113113	102102	233235	90094	136136	230233	109109	73073	280289	239281	137139	164164
MA18 ,	142142	157157	119119	142148	111125	102105	245245	100106	154154	230233	107121	83107	280289	239239	137145	156156
MA19 ,	115142	157177	115115	142148	129135	96096	229229	90090	136136	227227	113125	85095	292292	239239	131137	156168
MA20 ,	109109	157157	115115	136148	117117	96096	233235	94102	140140	230230	113139	75075	283289	239239	139139	158158
MA21 ,	109109	0	115115	139142	111111	96096	231237	100100	132142	230230	107107	73085	289292	239239	129137	164168
MA22 ,	136142	157157	115115	136139	111111	96096	243243	96096	144162	230230	107107	77077	280280	239239	129139	158164
MA23 ,	115115	157157	115117	148148	119125	96096	231245	84086	158158	0	107107	83083	289292	242242	135137	162162
MA24 ,	97103	157157	111115	136139	111123	99099	239239	98098	140156	230230	107119	87097	292292	239239	137139	164168
MA25 ,	97115	157157	113113	0	113119	96099	219237	86098	144154	245245	109115	75075	283283	196196	133141	158164
MA27 ,	100103	157157	109113	142142	131135	99099	233247	92098	132144	230230	125129	73083	292304	239239	137139	162162
MA29 ,	100112	157157	117119	142145	117125	96102	237237	96096	140144	227230	107121	79085	0	239254	137143	158164
MA31 ,	106109	157157	0	139148	125125	99099	255259	90092	144156	221230	121121	87087	289289	239242	131131	182182
MA33 ,	100109	157165	119119	142145	101111	96096	223251	82094	132142	224224	107147	83083	292292	239239	139139	156156
MA34 ,	100148	157157	0	136148	117117	96096	219233	86100	134144	230230	113125	87087	271307	239239	137147	182182
MA35 ,	100103	157157	115115	136148	111111	96096	235245	98098	142170	227227	107107	87093	280280	239239	135143	168168
MA36 ,	0	157167	119119	136139	111129	96096	233243	108110	144152	230233	107125	85093	289289	239239	137147	156160
MA37 ,	106109	157157	113119	145145	115143	96096	247247	88092	144150	230230	111137	73081	289289	239239	121131	164164
MA38 ,	115115	157159	119119	136142	123125	99099	237243	86094	132140	227227	119121	73073	289289	239239	135143	156156
MA39 ,	109133	159165	97119	136145	113117	96096	233241	92112	144144	230230	109113	77085	274274	239239	153153	156156
MA40 ,	103148	157165	111113	133133	117117	96096	239243	92108	136146	227230	107113	85095	289289	239239	149151	156156
MA41 ,	100100	157157	119119	142142	111115	96096	241241	98098	140160	221227	107111	75097	292292	239239	137137	156156
MA42 ,	100109	157167	119119	145148	111135	96096	233239	82094	144158	227227	107129	79097	289289	251251	121137	156168
MA44 ,	103109	157165	119119	142145	117131	96096	219219	96100	134148	230230	113127	89089	271271	239251	139139	156156
MA45 ,	100109	157157	119119	142145	111111	96096	243243	92096	144162	230230	107107	95095	292292	239239	131141	156156
MA46 ,	109109	153157	119119	142145	111111	96096	243243	92096	144162	230230	107107	95095	292292	239239	131141	156166
MA47 ,	100100	157165	109119	139139	111111	99099	235235	86094	134146	227227	107165	73093	292292	239248	135137	164164
MA48 ,	136136	157165	113113	142145	111113	96099	0	92108	146146	221221	109121	73085	271271	239239	121137	156156
MA49 ,	112112	165167	119119	142142	121133	96096	237237	104104	144152	227230	117127	99099	283283	239239	119139	156156
MA50 ,	106109	157165	119119	0	141143	99099	243243	94096	136136	227227	107137	83103	289292	239239	129129	156156
MA51 ,	100112	157157	115117	136142	113125	96096	235241	88098	136158	227227	109121	75075	271271	239239	119119	156156
MA52 ,	100100	157157	119119	136142	111113	96096	243243	88090	136136	227230	107109	89089	0	236236	131131	156156
MA53 ,	109109	157157	109117	145154	129129	111129	237241	90092	138154	224227	125129	85087	304304	239239	141149	156156
MA54 ,	109148	157165	105119	139145	111123	96096	241243	92096	134146	233233	107119	73081	268268	254260	121153	156172
MA55 ,	115115	157157	125127	136148	111129	96099	239253	84092	146180	227230	107125	85091	289292	239239	131133	156156
MA56 ,	103109	157167	119119	142142	113113	96096	231235	90092	132144	230230	109147	75097	289292	239239	131131	156156
MA57 ,	100109	157157	115119	139145	123135	93093	237237	90094	158158	227227	119129	87087	298298	251260	137137	156156
MA58 ,	100109	157157	119123	136148	111121	96096	229257	90090	134144	230230	107117	83085	0	245281	129141	160160

## Sheet: Original Annealing Temperature
Donax trunculus
Locus4
Locus6
Locus11
Locus15
Locus19
Locus22
Locus23
Locus26
Locus29
Locus40
POP
IC08-2011	,	157159	111117	111111	233241	134152	233233	107109	87093	289289	119129
IC11-2011	,	155159	111111	135135	239239	146148	227227	125129	67085	277310	139139
IC12-2011	,	159167	119119	129129	237243	136154	227227	121125	89089	301301	139147
IC13-2011	,	159167	119119	137141	227227	142148	227230	131135	73081	307307	139139
IC16-2011	,	159177	109117	111111	235253	150156	230230	107107	89089	268292	131139
IC18-2011	,	155167	113117	117121	219255	142150	227227	113117	83087	289289	137139
IC21-2011	,	155157	119119	139139	247271	136156	227233	117133	81089	283304	135135
IC22-2011	,	157169	109125	111111	255255	138152	230233	107107	83085	304310	133135
IC23-2011	,	157167	109117	111113	219237	144150	230230	107109	89097	301301	121131
IC24-2011	,	157167	119119	123123	237245	138152	227227	119119	83101	271271	131137
IC26-2011	,	159165	119119	111111	231231	134148	227227	107125	73083	292301	137137
IC27-2011	,	159167	119119	127133	233233	154156	227227	123127	95097	292301	137137
IC28-2011	,	157159	123123	111121	243255	134134	224227	107117	75083	292292	137143
IC29-2011	,	153155	119119	113129	225255	144148	227227	109125	75087	286286	133137
IC30-2011	,	155159	111117	113145	241241	164164	230230	109139	79081	286292	133135
IC33-2011	,	159165	109123	133139	267271	144156	230230	127133	85101	301301	131139
IC35-2011	,	155167	117117	111111	245245	138154	230245	107107	81087	301307	129139
IC37-2011	,	159165	109111	111115	233243	144146	230230	107111	75087	295295	129139
IC38-2011	,	159165	119119	113113	233235	144144	230230	109109	93097	283286	137151
IC40-2011	,	155159	113117	123123	231241	150150	230230	119119	73079	286319	137139
IC43-2011	,	159167	115131	111111	219241	136154	227227	107107	87091	307307	129129
IC44-2011	,	159165	109119	111145	241243	142150	0	139139	87097	292292	129157
IC45-2011	,	159159	117129	111143	241251	138162	227230	107137	83095	289304	129137
IC46-2011	,	155165	117123	113125	233233	138146	230230	109121	83083	286286	133133
IC47-2011	,	159159	113113	111129	235241	144160	230230	125125	75097	298322	137139
IC48-2011	,	157165	111117	129145	237259	126134	227227	125139	83085	271286	139143
IC50-2011	,	159159	107117	125137	233243	150150	227227	121131	91091	310310	139139
POP
DO02-2011	,	157165	119119	113125	233237	148148	230230	109121	75075	292301	139139
DO03-2011	,	157165	119119	125139	233237	148148	230230	109121	75099	295298	139139
DO04-2011	,	159165	83113	111111	233253	136142	221227	107109	79081	283283	121137
DO05-2011	,	157159	109117	111145	235245	142142	221221	107139	75087	310310	137137
DO06-2011	,	155165	111113	123135	251259	152152	227227	119129	85089	301301	143143
DO07-2011	,	159165	113115	111111	233243	142152	227230	107143	75085	295307	135155
DO10-2011	,	159167	109117	119119	241241	134158	230230	115129	75075	283283	129137
DO11-2011	,	155155	111117	111111	233241	130156	233233	107107	57091	292292	139139
DO12-2011	,	155159	119119	111111	245245	134140	227227	125129	91093	289289	129129
DO15-2011	,	155155	71117	111111	255255	130158	230230	107107	85093	292292	135147
DO16-2011	,	159173	113115	111113	219219	138162	221230	107109	95095	271271	139147
DO19-2011	,	155165	113113	111111	0	152152	227230	107107	89089	283283	143143
DO20-2011	,	157157	109119	113113	237253	132146	227230	109109	87087	292292	137139
DO21-2011	,	157165	77115	111111	241261	142142	224227	107107	83083	292301	145153
DO23-2011	,	159159	119119	127133	245245	140156	230230	123127	95095	0	137151
DO24-2011	,	159165	119123	111113	235243	140154	0	107109	85085	295295	129129
DO25-2011	,	155159	115123	111127	233245	136136	227227	107123	87089	0	147147
DO26-2011	,	157159	123123	113113	235245	146152	227227	109115	67095	292292	135137
DO28-2011	,	159159	111119	113113	219251	146156	230230	109109	81089	283283	139139
DO29-2011	,	155159	107113	111123	219233	144144	227227	121121	81097	271271	119139
DO30-2011	,	159159	75115	111141	219219	140152	221221	107135	67085	283301	139143
DO31-2011	,	159165	109119	111111	265279	132140	230230	107107	75075	298298	135135
DO32-2011	,	155165	115117	111139	231235	142152	230230	107133	89089	292298	131131
DO33-2011	,	155165	115115	113121	245245	152158	230230	109117	73085	289289	139139
DO34-2011	,	157167	119119	111113	237243	140146	230230	107109	79079	289289	137139
DO35-2011	,	159159	107109	111111	243255	136154	221224	107107	75093	271271	127139
DO36-2011	,	159159	113113	111111	255255	146146	221230	107107	75091	292292	121131
DO37-2011	,	159169	119119	111111	249249	150158	227227	107107	81095	286286	139143
DO39-2011	,	159165	111115	111111	241241	132150	230230	107107	73079	292292	141141
DO40-2011	,	159165	99111	117117	237237	142154	227227	113139	73083	271271	141141
DO41-2011	,	155159	111115	111137	245245	138150	227227	107133	95095	0	137137
DO42-2011	,	0	119119	111111	0	134156	230230	107107	75075	292292	121141
DO44-2011	,	159165	119119	139141	233245	142142	233233	135159	89091	271289	139145
DO46-2011	,	159159	109119	111125	247247	140146	230230	107121	89089	295295	137139
DO47-2011	,	157159	115117	111111	219231	142142	230230	107127	75087	289289	135135
DO48-2011	,	159159	113119	0	233247	132152	230230	133159	79101	286301	121121
DO50-2011	,	159165	111111	111111	255273	148152	221221	107133	75075	271292	139139
POP
MA01-2011	,	157157	117119	131139	237271	134142	221221	127133	67093	292292	133139
MA02-2011	,	157157	129129	113135	225231	130144	221221	109113	73095	292298	131131
MA05-2011	,	157157	121121	115137	235235	136146	227236	111143	79083	280289	131137
MA06-2011	,	157157	111115	145145	235243	138154	227230	107121	79089	0	129143
MA07-2011	,	157157	109119	123129	245279	142142	230230	107119	73085	292292	129145
MA08-2011	,	157157	113113	111119	237243	166176	230230	143147	93093	286310	121151
MA09-2011	,	157157	115117	111113	233249	138156	227227	107109	81087	286286	121139
MA10-2011	,	157157	115115	131133	241241	134134	227227	127127	0	292292	139139
MA12-2011	,	157157	115115	113123	239239	134140	227230	109119	69073	292292	139139
MA13-2011	,	157157	109109	103111	235241	132142	230230	107123	85095	292292	121131
MA14-2011	,	157157	109115	111111	235243	152152	230230	107157	73087	271304	137139
MA15-2011	,	151157	113115	111119	243243	142146	230230	107121	97097	301301	137139
MA16-2011	,	157157	113123	111131	231245	160160	227230	107149	0	289289	131131
MA19-2011	,	157177	115115	129135	229229	136136	227227	113125	85095	292292	131137
MA20-2011	,	157157	115115	117117	233235	140140	230230	113139	75075	283289	139139
MA21-2011	,	0	115115	111111	231237	132142	230230	107107	73085	289292	129137
MA22-2011	,	157157	115115	111111	243243	144162	230230	107107	77077	280280	129139
MA23-2011	,	157157	115117	119125	231245	158158	0	107107	83083	289292	135137
MA24-2011	,	157157	111115	111123	239239	140156	230230	107119	87097	292292	137139
MA25-2011	,	157157	113113	113119	219237	144154	245245	109115	75075	283283	133141
MA31-2011	,	157157	0	125125	255259	144156	221230	121121	87087	289289	131131
MA32-2011	,	157179	119119	119125	0	140154	0	115121	79087	283286	129129
MA33-2011	,	157165	119119	101111	223251	132142	224224	107147	83083	292292	139139
MA35-2011	,	157157	115115	111111	235245	142170	227227	107107	87093	280280	135143
MA36-2011	,	157167	119119	111129	233243	144152	230233	107125	85093	289289	137147
MA38-2011	,	157159	119119	123125	237243	132140	227227	119121	73073	289289	135143
MA39-2011	,	159165	97119	113117	233241	144144	230230	109113	77085	274274	153153
MA41-2011	,	157157	119119	111115	241241	140160	221227	107111	75097	292292	137137
MA42-2011	,	157167	119119	111135	233239	144158	227227	107129	79097	289289	121137
MA50-2011	,	157165	119119	141143	243243	136136	227227	107137	83103	289292	129129

## Sheet: New Annealing Temperature
Donax trunculus
Locus4
Locus6
Locus11
Locus15
Locus19
Locus22
Locus23
Locus26
Locus29
Locus40
POP
IC08-2012	,	107185	101101	123125	235265	138144	227227	121121	83097	298298	133135
IC12-2012	,	135135	115161	111135	0	130150	221221	107131	83089	292292	121131
IC13-2012	,	145193	123135	111119	231231	158160	230230	107115	73073	292292	131139
IC16-2012	,	0	0	117133	227227	134154	227230	113129	83083	292310	137137
IC18-2012	,	113135	89137	111113	235247	136148	227230	107109	83087	289301	137151
IC21-2012	,	119135	101101	123125	219243	156162	233233	119121	87095	268268	129135
IC22-2012	,	113135	89137	113123	245261	134146	230230	109119	85095	0	129137
IC23-2012	,	113127	101109	111113	243243	148156	230230	107109	73083	301301	121143
IC24-2012	,	0	0	111115	243255	146160	233233	107111	91093	0	139139
IC26-2012	,	185189	101137	111113	245253	132152	227227	107109	99099	289301	129139
IC27-2012	,	113173	95137	113113	253255	150150	227227	109139	73095	283301	125139
IC28-2012	,	113127	101113	111135	219241	148150	230230	107131	71085	295295	121147
IC29-2012	,	105147	99137	111131	233239	138158	227227	107125	85093	289289	135139
IC30-2012	,	137169	101137	113113	251253	142150	227227	109147	79091	0	131139
IC33-2012	,	135189	93117	113115	219241	156158	230233	109111	75085	280280	131137
IC35-2012	,	147185	129137	111113	233237	154154	227227	107109	73081	268268	131133
IC37-2012	,	183183	103115	113127	233261	132152	227227	109123	75085	0	139139
IC38-2012	,	135171	101137	115115	235257	138148	227227	111117	75091	283292	137147
IC40-2012	,	135185	91095	111111	233243	132160	227230	107107	89107	289289	145147
IC43-2012	,	135191	101113	113119	239243	142142	227233	109115	87087	298298	137137
IC44-2012	,	135185	101113	111133	241245	136144	0	107127	73101	265307	139151
IC45-2012	,	113119	101101	133141	219253	140152	0	129135	79085	0	121121
IC46-2012	,	207207	101109	117117	229229	142150	221221	113135	73089	283283	129137
IC47-2012	,	119147	89129	111131	0	138154	230230	107127	79093	292292	137147
IC48-2012	,	127147	111137	113131	233247	132136	227230	109127	81087	0	137139
IC50-2012	,	185185	113137	113133	239239	134158	227233	109127	81101	289289	137153
POP
DO02-2012	,	129135	117137	133133	235251	142142	221230	125127	91091	0	139155
DO03-2012	,	127135	113137	111145	237255	134146	227230	131139	73073	280289	137147
DO04-2012	,	113195	135137	113113	0	0	0	0	81081	289289	0
DO05-2012	,	113195	93137	113113	247247	148156	227227	109137	85095	280280	139141
DO06-2012	,	111185	69101	113119	239241	144154	227230	109115	85085	289289	137137
DO07-2012	,	135191	101105	111133	0	132140	0	107127	91093	0	135135
DO10-2012	,	113119	89139	111121	233241	142154	227227	107117	85085	289289	131137
DO11-2012	,	113147	101103	111111	243251	146146	224230	107107	83085	0	121129
DO12-2012	,	185185	101113	117119	231265	142156	221227	113115	85087	0	139139
DO15-2012	,	113127	111137	111111	219255	136148	233233	107117	93095	0	131147
DO16-2012	,	189191	119137	111149	239251	134134	227230	143149	87093	0	129139
DO19-2012	,	113185	97139	111117	245245	134156	221224	107113	75085	289298	129137
DO20-2012	,	161185	101137	111117	245245	140144	227227	107113	73085	0	157161
DO21-2012	,	0	0	111113	219237	150154	227230	107109	73089	289289	129139
DO23-2012	,	135193	93137	125127	235255	138142	224224	121123	87087	301301	121139
DO24-2012	,	169185	101137	123123	231239	132134	221230	117119	89103	0	129137
DO25-2012	,	147147	93137	123145	251253	140146	221230	119139	99099	292292	135137
DO26-2012	,	119119	97137	117117	243253	152154	227227	113143	85105	283283	121143
DO28-2012	,	173207	101101	123123	235253	132144	227227	119119	67093	0	131137
DO29-2012	,	135191	103137	115117	229233	142142	230230	111113	89091	265265	121131
DO30-2012	,	135193	101137	111111	237239	138154	227227	107107	81083	292292	139139
DO31-2012	,	119157	137161	113123	229265	0	230230	109119	87101	307307	139139
DO32-2012	,	113193	101137	121125	219237	134136	221221	117121	79089	0	121121
DO33-2012	,	147171	101137	111113	237249	154156	227230	107109	87089	289289	137161
DO34-2012	,	135207	111137	113123	245245	132146	224227	109119	77085	265289	137149
DO35-2012	,	193207	97101	111111	239247	136154	227227	107107	75093	283283	129139
DO36-2012	,	191207	95135	111135	251253	132150	230230	107129	73081	289289	139149
DO37-2012	,	135145	89137	111113	239243	136152	227227	107109	79091	283301	121137
DO39-2012	,	147147	115137	111123	239239	136136	230230	107119	67067	304304	121141
DO40-2012	,	123147	93119	111137	219231	146170	230230	107131	87093	292292	149151
DO41-2012	,	119127	111115	111111	253255	142144	227230	107135	81089	0	131153
DO42-2012	,	107135	93123	111117	237239	138138	227230	107113	77077	265292	121137
DO44-2012	,	99159	69101	111111	233245	146162	230230	107137	75077	289292	137161
DO46-2012	,	113127	89113	129149	239239	150152	233233	125143	73103	0	121129
DO47-2012	,	135147	109135	111141	239241	146156	227227	135139	75087	292292	147151
DO48-2012	,	135147	137161	111137	253259	132144	227227	107131	73097	0	137161
DO50-2012	,	113197	101113	111111	237245	128132	227227	107119	81097	0	129133
POP
MA01-2012	,	105171	109137	113117	0	0	0	0	81081	0	0
MA02-2012	,	113119	99117	111115	0	0	0	0	85085	0	0
MA05-2012	,	141171	109139	111137	0	0	0	0	73081	0	0
MA06-2012	,	121147	69089	113129	0	0	0	0	89091	292292	0
MA07-2012	,	121165	125141	111111	237243	128130	230230	107151	77087	289289	137137
MA08-2012	,	169185	95117	111113	233241	144146	230230	107109	75075	295295	131139
MA09-2012	,	113135	101137	111141	231253	140144	221221	107135	79087	289289	121129
MA10-2012	,	113113	89137	111131	0	146148	0	107127	89091	0	121133
MA11-2012	,	127147	89137	111119	281281	144148	227227	107115	97097	0	139143
MA12-2012	,	145145	101137	113113	237273	136146	230230	109109	97097	0	0
MA13-2012	,	135185	89115	139143	245245	152152	227227	133137	75091	289289	125139
MA14-2012	,	129135	101137	111123	249249	152154	227227	107119	83091	295295	135147
MA15-2012	,	191195	93139	111141	235235	144146	221230	107135	87093	289289	131131
MA16-2012	,	135209	101137	119119	267267	134142	227227	115141	73083	0	121137
MA19-2012	,	171171	101137	123131	239239	148166	227230	119127	71093	292292	131141
MA20-2012	,	145185	111137	111135	239241	134134	230230	107129	85099	283283	137139
MA21-2012	,	145145	69091	111117	241243	154154	230233	107113	73081	0	131139
MA22-2012	,	145191	93101	111143	0	134140	245245	107137	83093	0	131139
MA23-2012	,	113183	101101	111131	235261	140144	230230	119127	73077	0	121137
MA24-2012	,	0	69069	111121	237241	132138	236236	107117	0	0	133151
MA25-2012	,	147185	109137	111111	251253	134140	227230	107107	91101	292292	121137
MA31-2012	,	0	117137	113113	239265	144154	227227	109109	87087	274274	135139
MA32-2012	,	133167	95123	111111	243243	140144	227230	107115	0	274274	121143
MA33-2012	,	135135	121137	111125	241241	134144	215215	107121	79111	283283	153161
MA35-2012	,	119119	113135	111111	219239	138156	227227	107107	93099	0	137139
MA36-2012	,	189207	69137	111113	243257	136152	221224	107109	77077	0	135147
MA38-2012	,	139139	137137	111143	239273	138146	227227	107137	95099	0	131131
MA39-2012	,	119119	115137	111111	0	144144	0	0	73081	301301	137139
MA41-2012	,	113165	135139	113115	237239	140158	227230	109111	83091	0	137139
MA42-2012	,	135185	101135	111117	239239	152152	230230	107113	77097	301301	121139
MA50-2012	,	145145	79115	131133	229245	134146	230230	123129	83085	292292	149149
